# Supplementary material for: Blue- and white-light emitting 2D metal–organic frameworks of cis-5-norbornene-endo-2,3-dicarboxylic acid
Source: Royal Society of Chemistry journal article supplement (doi:10.1039/d4ce00985a), 2025-01-01
Supplement: d4ce00985a1.pdf [file d4ce00985a1.pdf]

## Electronic Supplementary Information

# Blue and White-light emitting 2D Metal-organic frameworks of *cis*-5-Norbornene-endo-2,3-dicarboxylic acid

Ahmed Mohammed A. Alghamdi<sup>†</sup>, Shakeeba Cholikadam<sup>†</sup>, Mohammed Fettouhi<sup>† §</sup>, Abdul Nasar Kalanthoden<sup>†</sup>, Almaz S. Jalilov<sup>‡\*</sup>, Abdul Malik P. Peedikakkal<sup>† § \*</sup>

<sup>†</sup>Department of Chemistry, King Fahd University of Petroleum and Minerals, P.O. Box 1710, Dhahran 31261, Saudi Arabia

<sup>§</sup>Interdisciplinary Research Center for Refining and Advanced Chemicals, King Fahd University of Petroleum and Minerals, Dhahran 31261, Saudi Arabia.

<sup>‡</sup>Department of Biology, Chemistry and Environmental Sciences, American University of Sharjah, Sharjah, P.O. Box 26666, United Arab Emirates.

| Table of Contents                                                                                     | Page No. |
|-------------------------------------------------------------------------------------------------------|----------|
| <b>X-ray Crystallography</b>                                                                          | 2        |
| Figure S1. An illustration of coordination environment in <b>1</b> along <i>z</i> axis.               | 2        |
| Figure S2. Schematic representation of seven-coordinated geometry in <b>1</b> .                       | 3        |
| Figure S3. An illustration of mapping of surface space-filling in a polyhedra of Pb(II) in <b>1</b> . |          |
| Figure S3. An illustration of mapping of surface space-filling in a 2D layer in <b>1</b> .            | 3        |
| Figure S5. An illustration of coordination environment in <b>2</b> along <i>y</i> axis.               | 3        |
| Table S1. Selected bond length (Å) and bond angles (°) in <b>1</b>                                    | 4        |
| Table S2. Selected bond length (Å) and bond angles(°) in <b>2</b>                                     | 6        |
| <b>X-ray Powder Patterns</b>                                                                          | 7        |
| Figure S6. X-ray powder patterns of compounds <b>1</b> .                                              | 7        |
| Figure S7. X-ray powder patterns of compounds <b>2</b> .                                              | 8        |
| <b>FT-IR Spectra</b>                                                                                  | 9        |
| Figure S8. FT-IR Spectra of <b>1</b> .                                                                | 9        |
| Figure S9. FT-IR Spectra of <b>2</b> .                                                                | 9        |
| <b>TGA Analysis</b>                                                                                   | 10       |
| Figure S10. TGA analysis of <b>1</b> .                                                                | 10       |

---

|                                                                         |    |
|-------------------------------------------------------------------------|----|
| <i>Figure S11.</i> TGA analysis of <b>2</b> .                           | 11 |
| <b>Solid-state UV-vis spectra</b>                                       | 12 |
| <i>Figure S12.</i> Solid-state UV-vis spectra of compounds <b>1-2</b> . | 12 |

---

## X-ray Crystallography

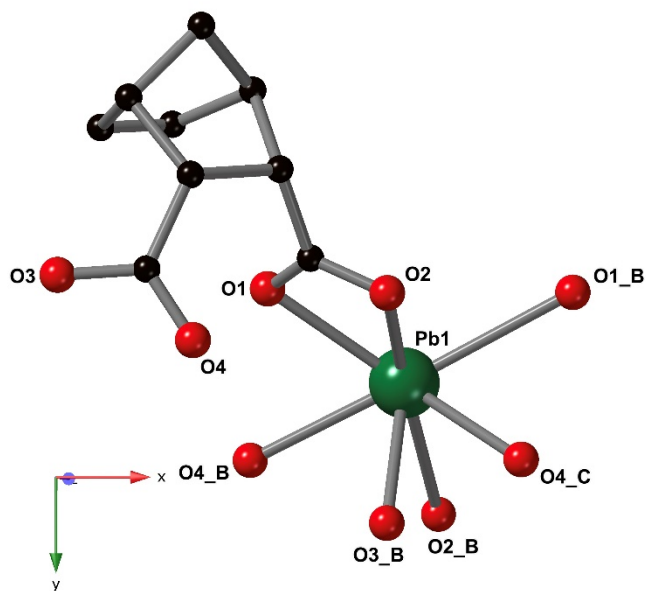

*Figure S1.* An illustration of coordination environment in **1** along  $z$  axis.

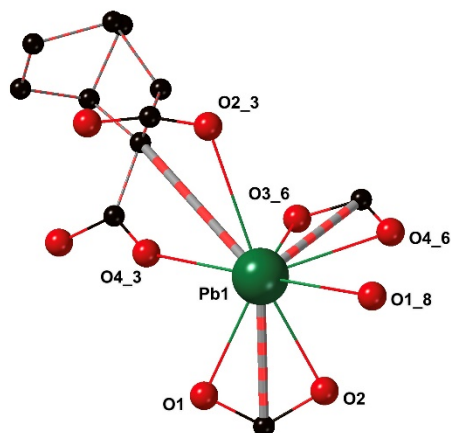

*Figure S2.* Schematic representation of seven-coordinated geometry in **1** and its reduction to a simple, planar trigonal description using VBV model as described in Miguel A. H et al. *Acta Cryst.* 2006. **B62**, 1038–1042.

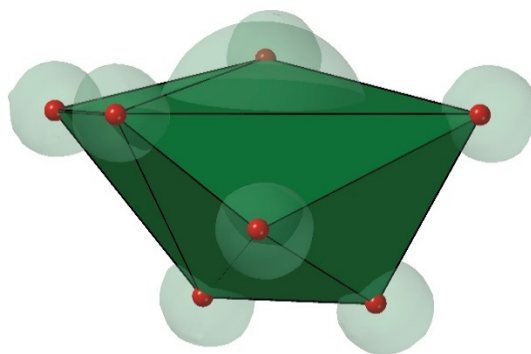

*Figure S3.* An illustration of mapping of surface space-filling in a polyhedra of Pb(II) in **1**. The surface space-filling clearly shows the hemi-directed coordination geometry.

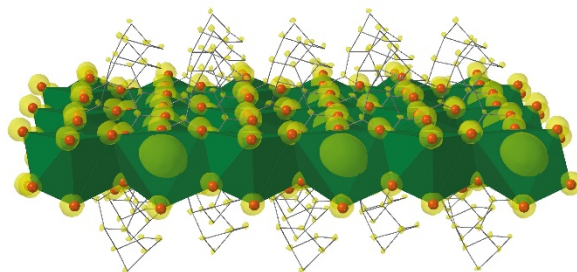

*Figure S4.* An illustration of mapping of surface space-filling in a 2D layer in **1**.

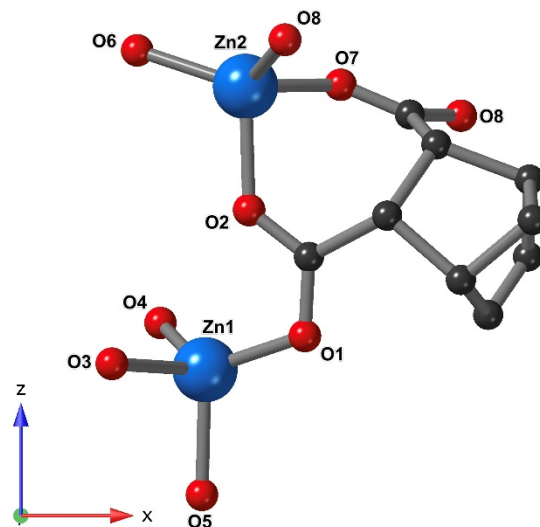

Figure S5. An illustration of coordination environment in **2** along *y* axis.

**Table S1.** Selected bond length (Å) and bond angles (°) in **1**

|                     |           |
|---------------------|-----------|
| Pb(1)-O(3)#1        | 2.405(8)  |
| Pb(1)-O(2)          | 2.503(8)  |
| Pb(1)-O(1)          | 2.551(11) |
| Pb(1)-O(4)#1        | 2.602(10) |
| Pb(1)-O(4)#2        | 2.619(10) |
| Pb(1)-C(4)#1        | 2.849(13) |
| Pb(1)-C(1)          | 2.860(14) |
| O(1)-C(1)           | 1.231(18) |
| O(2)-C(1)           | 1.29(2)   |
| O(3)-C(4)           | 1.30(3)   |
| O(4)-C(4)           | 1.247(16) |
| C(1)-C(2)           | 1.517(19) |
| C(2)-C(3)           | 1.557(18) |
| C(2)-C(8)           | 1.574(18) |
| C(3)-C(4)           | 1.504(18) |
| C(3)-C(5)           | 1.535(18) |
| C(5)-C(6)           | 1.50(2)   |
| C(5)-C(9)           | 1.517(19) |
| C(6)-C(7)           | 1.30(2)   |
| C(7)-C(8)           | 1.53(2)   |
| C(8)-C(9)           | 1.536(19) |
| O(3)#1-Pb(1)-O(2)   | 89.6(3)   |
| O(3)#1-Pb(1)-O(1)   | 102.4(5)  |
| O(2)-Pb(1)-O(1)     | 51.8(4)   |
| O(3)#1-Pb(1)-O(4)#1 | 52.0(6)   |
| O(2)-Pb(1)-O(4)#1   | 75.9(4)   |
| O(1)-Pb(1)-O(4)#1   | 123.4(3)  |
| O(3)#1-Pb(1)-O(4)#2 | 70.2(6)   |
| O(2)-Pb(1)-O(4)#2   | 110.2(4)  |

|                      |           |
|----------------------|-----------|
| O(1)-Pb(1)-O(4)#2    | 68.2(3)   |
| O(4)#1-Pb(1)-O(4)#2  | 122.0(4)  |
| O(3)#1-Pb(1)-C(4)#1  | 26.9(6)   |
| O(2)-Pb(1)-C(4)#1    | 86.8(4)   |
| O(1)-Pb(1)-C(4)#1    | 120.0(4)  |
| O(4)#1-Pb(1)-C(4)#1  | 26.0(3)   |
| O(4)#2-Pb(1)-C(4)#1  | 96.2(3)   |
| O(3)#1-Pb(1)-C(1)    | 99.9(4)   |
| O(2)-Pb(1)-C(1)      | 26.7(4)   |
| O(1)-Pb(1)-C(1)      | 25.5(4)   |
| O(4)#1-Pb(1)-C(1)    | 101.7(4)  |
| O(4)#2-Pb(1)-C(1)    | 90.5(4)   |
| C(4)#1-Pb(1)-C(1)    | 107.2(4)  |
| C(1)-O(1)-Pb(1)      | 91.4(9)   |
| C(1)-O(2)-Pb(1)      | 92.3(9)   |
| C(4)-O(3)-Pb(1)#3    | 96.0(10)  |
| C(4)-O(4)-Pb(1)#3    | 88.1(8)   |
| C(4)-O(4)-Pb(1)#4    | 150.6(9)  |
| Pb(1)#3-O(4)-Pb(1)#4 | 116.0(4)  |
| O(1)-C(1)-O(2)       | 122.6(13) |
| O(1)-C(1)-C(2)       | 120.2(13) |
| O(2)-C(1)-C(2)       | 116.9(12) |
| O(1)-C(1)-Pb(1)      | 63.1(8)   |
| O(2)-C(1)-Pb(1)      | 61.0(7)   |
| C(2)-C(1)-Pb(1)      | 161.5(9)  |
| C(1)-C(2)-C(3)       | 116.5(11) |
| C(1)-C(2)-C(8)       | 114.8(10) |
| C(3)-C(2)-C(8)       | 100.6(10) |
| C(4)-C(3)-C(5)       | 116.0(11) |
| C(4)-C(3)-C(2)       | 115.6(11) |
| C(5)-C(3)-C(2)       | 104.2(10) |
| O(4)-C(4)-O(3)       | 119.7(12) |
| O(4)-C(4)-C(3)       | 122.1(12) |
| O(3)-C(4)-C(3)       | 118.1(11) |
| O(4)-C(4)-Pb(1)#3    | 65.9(7)   |
| O(3)-C(4)-Pb(1)#3    | 57.1(6)   |
| C(3)-C(4)-Pb(1)#3    | 157.2(8)  |
| C(6)-C(5)-C(9)       | 100.8(12) |
| C(6)-C(5)-C(3)       | 107.0(11) |
| C(9)-C(5)-C(3)       | 100.1(11) |
| C(7)-C(6)-C(5)       | 107.9(16) |
| C(6)-C(7)-C(8)       | 107.6(13) |
| C(7)-C(8)-C(9)       | 99.6(12)  |
| C(7)-C(8)-C(2)       | 107.9(10) |
| C(9)-C(8)-C(2)       | 99.3(11)  |
| C(5)-C(9)-C(8)       | 93.6(10)  |

---

Symmetry transformations used to generate equivalent atoms:

#1  $-x+3/2, -y+1/2, z-1/2$  #2  $x-1/2, -y+1/2, z$  #3  $-x+3/2, -y+1/2, z+1/2$   
#4  $x+1/2, -y+1/2, z$

**Table S2.** Selected bond length (Å) and bond angles (°) in **2**

---

|                     |            |
|---------------------|------------|
| Zn(1)-O(2)          | 1.9394(19) |
| Zn(1)-O(4)#1        | 1.9610(18) |
| Zn(1)-O(3)#2        | 1.967(2)   |
| Zn(1)-O(1)#2        | 1.980(2)   |
| O(1)-C(1)           | 1.258(3)   |
| O(2)-C(1)           | 1.266(3)   |
| O(3)-C(9)           | 1.261(3)   |
| O(4)-C(9)           | 1.254(3)   |
| C(1)-C(2)           | 1.516(3)   |
| C(2)-C(3)           | 1.563(3)   |
| C(2)-C(6)           | 1.585(3)   |
| C(9)-C(6)           | 1.520(3)   |
| C(3)-C(7)           | 1.511(4)   |
| C(3)-C(4)           | 1.533(4)   |
| C(6)-C(5)           | 1.555(4)   |
| C(8)-C(7)           | 1.331(4)   |
| C(8)-C(5)           | 1.504(4)   |
| C(5)-C(4)           | 1.533(4)   |
| <hr/>               |            |
| O(2)-Zn(1)-O(4)#1   | 122.92(8)  |
| O(2)-Zn(1)-O(3)#2   | 112.41(9)  |
| O(4)#1-Zn(1)-O(3)#2 | 105.92(9)  |
| O(2)-Zn(1)-O(1)#2   | 110.02(8)  |
| O(4)#1-Zn(1)-O(1)#2 | 108.96(9)  |
| O(3)#2-Zn(1)-O(1)#2 | 92.26(9)   |
| C(1)-O(1)-Zn(1)#3   | 126.02(17) |
| C(1)-O(2)-Zn(1)     | 111.17(17) |
| C(9)-O(3)-Zn(1)#3   | 125.84(18) |
| C(9)-O(4)-Zn(1)#1   | 113.13(17) |
| O(1)-C(1)-O(2)      | 120.4(2)   |
| O(1)-C(1)-C(2)      | 121.5(2)   |
| O(2)-C(1)-C(2)      | 117.9(2)   |
| C(1)-C(2)-C(3)      | 113.8(2)   |
| C(1)-C(2)-C(6)      | 120.39(19) |
| C(3)-C(2)-C(6)      | 101.93(18) |
| O(4)-C(9)-O(3)      | 120.5(2)   |
| O(4)-C(9)-C(6)      | 117.8(2)   |
| O(3)-C(9)-C(6)      | 121.5(2)   |
| C(7)-C(3)-C(4)      | 100.6(2)   |
| C(7)-C(3)-C(2)      | 106.7(2)   |
| C(4)-C(3)-C(2)      | 100.2(2)   |
| C(9)-C(6)-C(5)      | 113.1(2)   |
| C(9)-C(6)-C(2)      | 120.4(2)   |
| C(5)-C(6)-C(2)      | 102.23(19) |
| C(7)-C(8)-C(5)      | 107.8(3)   |
| C(8)-C(7)-C(3)      | 107.2(3)   |
| C(8)-C(5)-C(4)      | 100.5(2)   |
| C(8)-C(5)-C(6)      | 106.8(2)   |
| C(4)-C(5)-C(6)      | 100.4(2)   |
| C(5)-C(4)-C(3)      | 93.8(2)    |

---

Symmetry transformations used to generate equivalent atoms:

#1 -x+1,-y+1,-z+1 #2 -x+1,y-1/2,-z+3/2 #3 -x+1,y+1/2,-z+3/2

## X-ray Powder Pattern

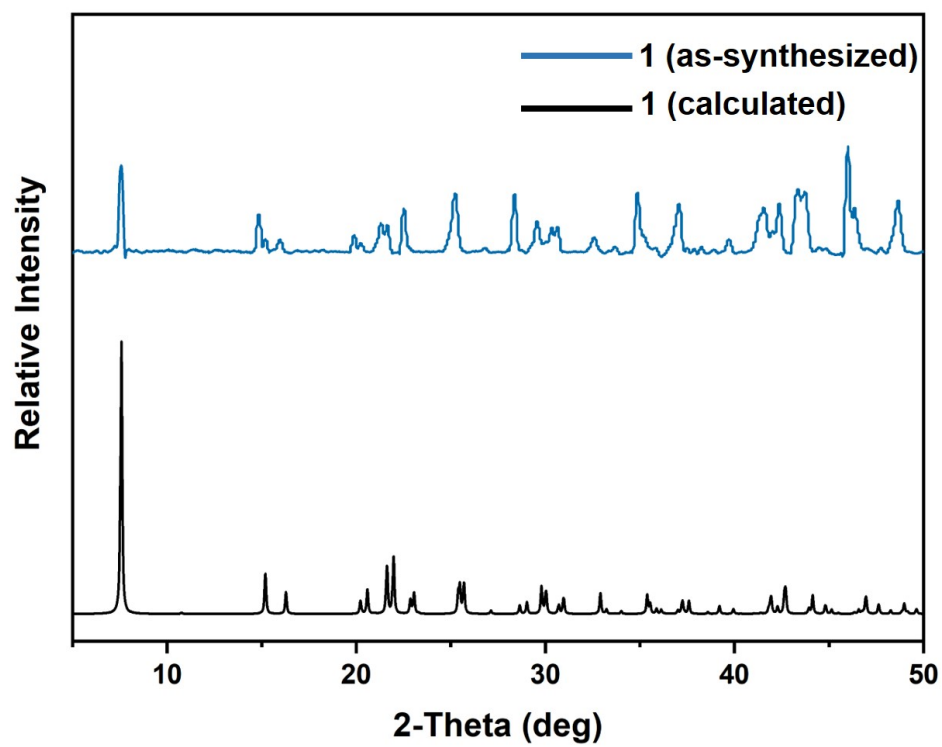

Figure S6. X-ray powder patterns of compounds 1.

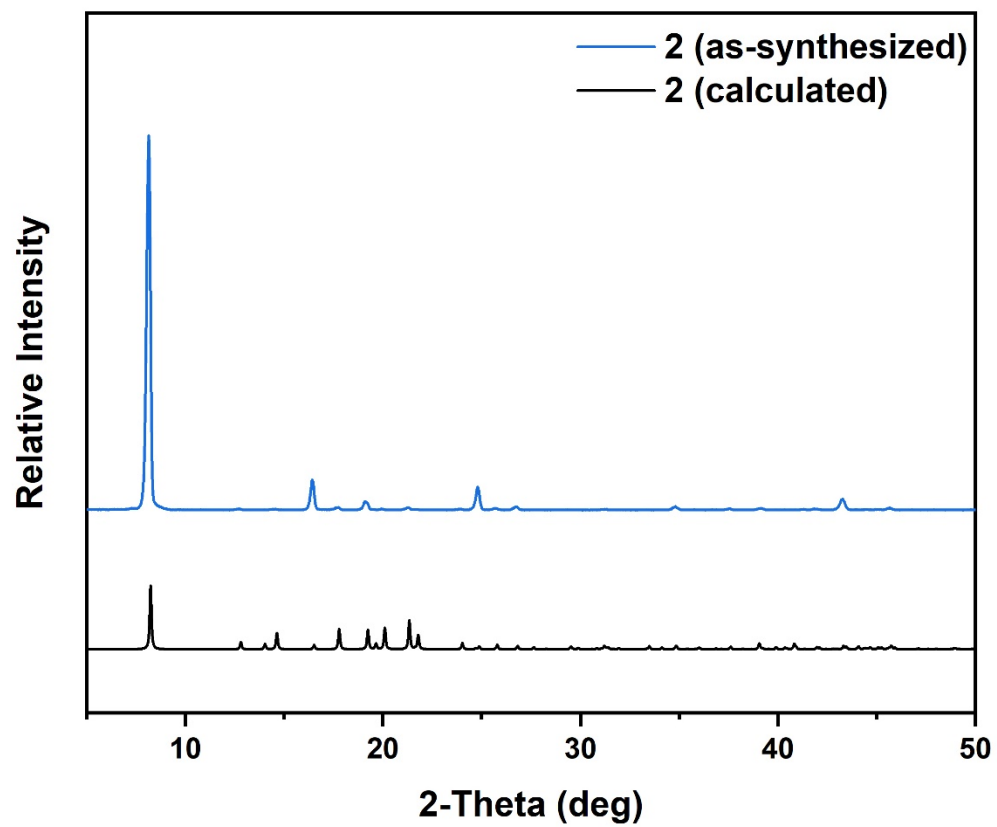

Figure S7. X-ray powder patterns of compounds 2.



## FT-IR Spectra

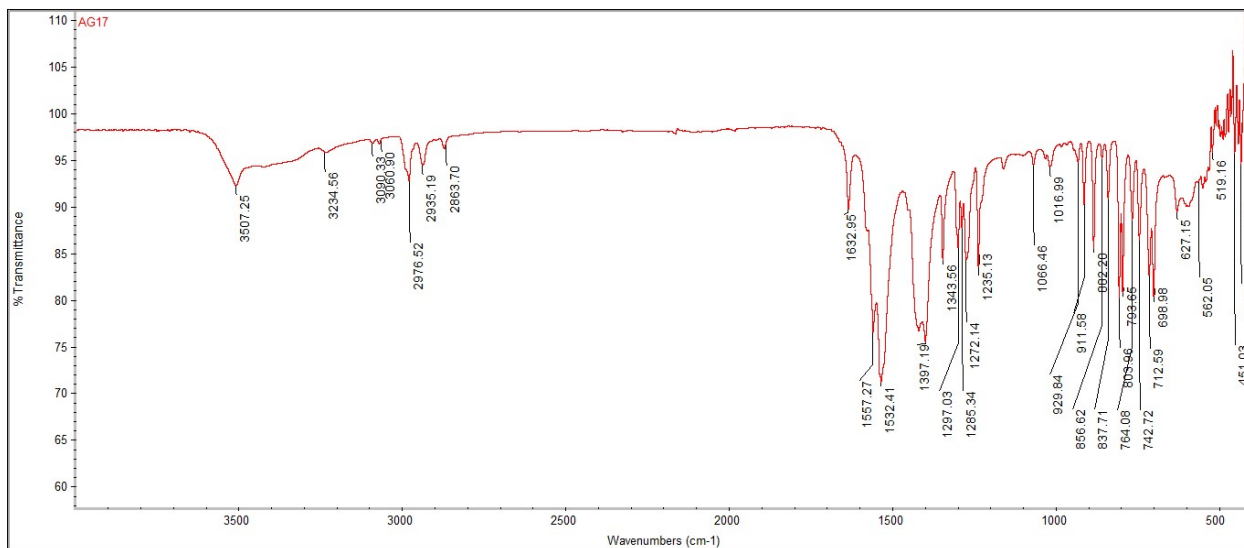

Figure S8. FT-IR Spectra of 1.

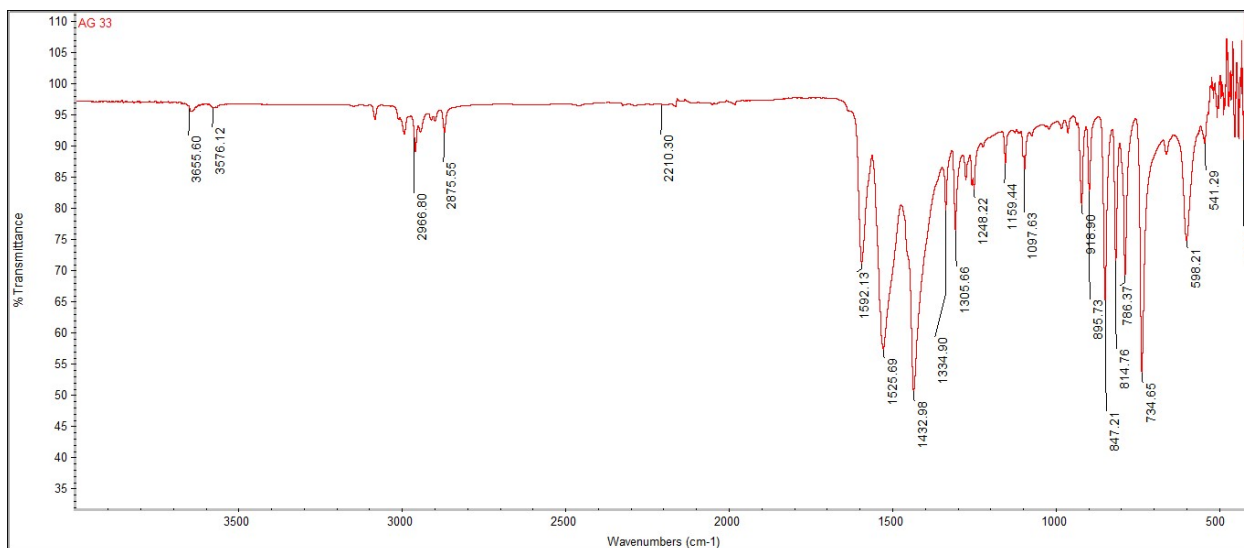

Figure S9. FT-IR Spectra of 2.

## TGA analysis

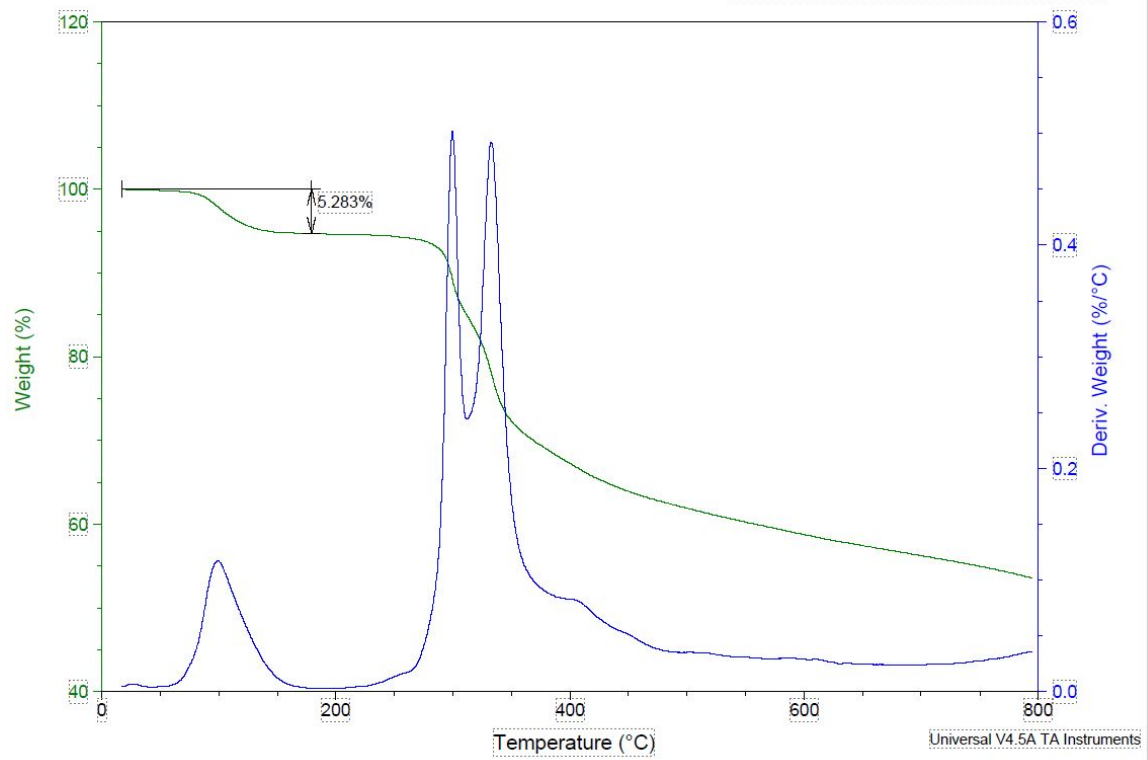

Figure S10. TGA Analysis of 1.

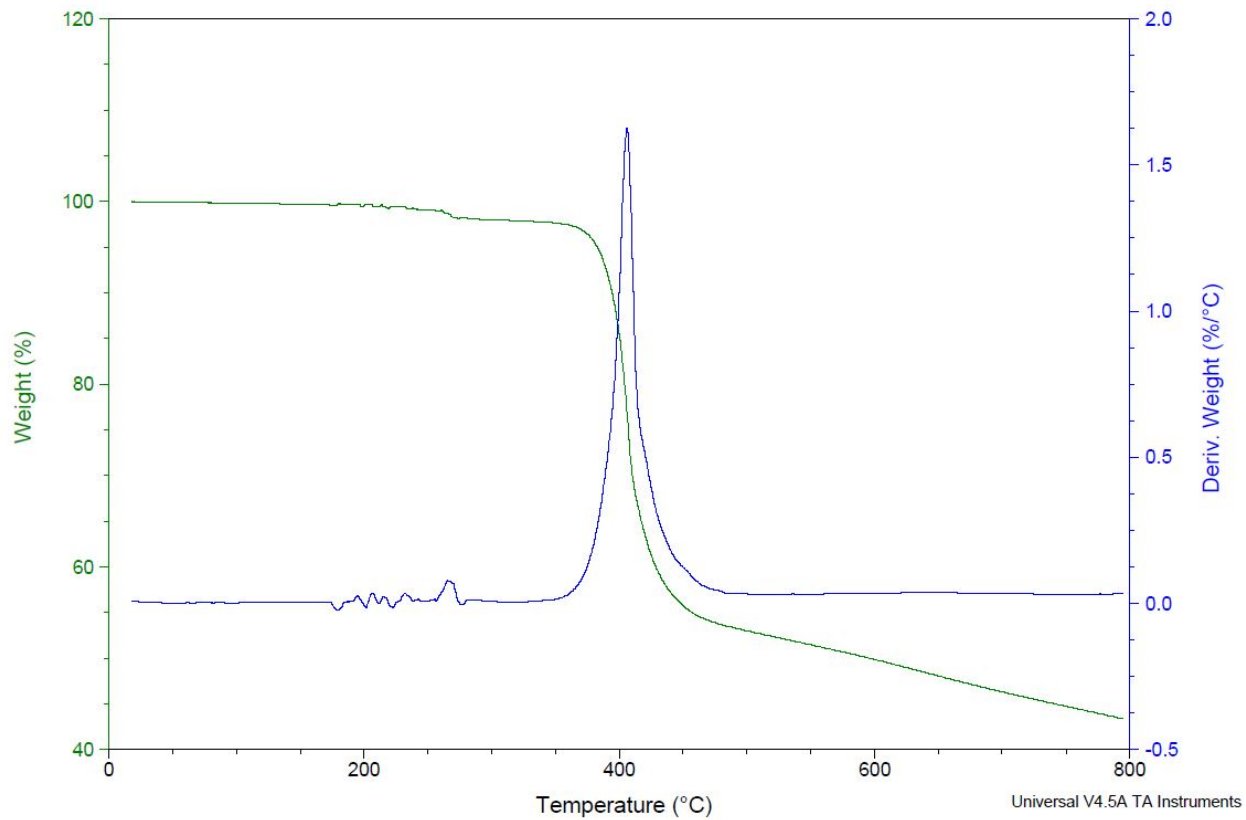

*Figure S11.* TGA Analysis of **2**.

## Solid-state UV-vis spectra

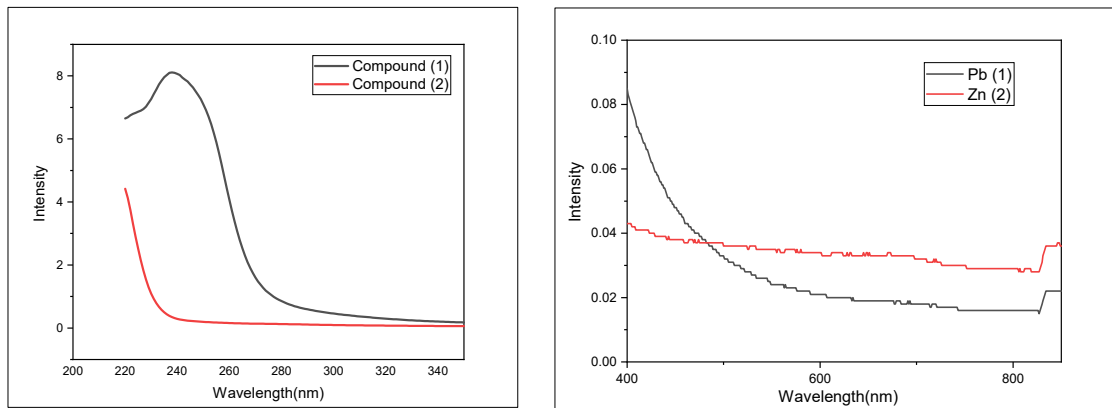

Figure S12. Solid-state UV-vis spectra of compounds **1-2**.
